# Supplementary material for: Asthma as a Risk Factor for Invasive Pneumococcal Disease
Source: Atypon-hosted journal article supplement (doi:10.1056/nejmoa044113), 2005-05-18
Supplement: 2082sa1.pdf [file 2082sa1.pdf]

## Supplementary Appendix

This appendix has been provided by the authors to give readers additional information about their work.

Supplement to: Talbot TR, Hartert TV, Mitchel E, et al. Asthma as a risk factor for invasive pneumococcal disease. *N Engl J Med* 2005;352:2082-90.

**Appendix A: High-risk conditions as defined by ICD-9-CM codes and prescription medications in Tennessee Medicaid data files.**

| High-risk Condition <sup>a</sup>                                | ICD-9-CM Codes                                                                              | Condition-specific Prescription Medications <sup>a</sup>                                                                                                                                                                                                   |
|-----------------------------------------------------------------|---------------------------------------------------------------------------------------------|------------------------------------------------------------------------------------------------------------------------------------------------------------------------------------------------------------------------------------------------------------|
| <b>Human Immunodeficiency Virus (HIV) infection<sup>b</sup></b> | 042.XX-044.XX; V08                                                                          | zidovudine, didanosine, zalcitabine, stavudine, indinavir, ritonavir, saquinavir, nevirapine, lamivudine, nelfinavir, delavirdine, abacavir, amprenavir, efavirenz, lamivudine-zidovudine, abacavir-lamivudine-zidovudine, lopinavir-ritonavir, atazanavir |
| <b>Sickle cell disease<sup>b</sup></b>                          | 282.6                                                                                       |                                                                                                                                                                                                                                                            |
| <b>Nonasthma COPD<sup>b</sup></b>                               | 277.0; 770.7; 490.XX – 496.XX except 493.XX (asthma); 500.XX – 506.XX; 515.XX-517.XX; 519.9 |                                                                                                                                                                                                                                                            |

|                                                                                    |                                                                                                                                        |         |
|------------------------------------------------------------------------------------|----------------------------------------------------------------------------------------------------------------------------------------|---------|
| <b>Cardiac disease,<br/>including<br/>congenital heart<br/>disease<sup>b</sup></b> | 393.XX-398.XX;<br>402.XX-404.XX;<br>410.XX-414.XX;<br>415.XX-417.XX;<br>425.XX; 428.XX;<br>429.XX; 745.XX-<br>746.XX;<br>747.1 – 747.4 | digoxin |
|------------------------------------------------------------------------------------|----------------------------------------------------------------------------------------------------------------------------------------|---------|

|                                                                                                                                            |                                                                                                  |                                                                                                                                                                                                                                                                                                                                                                                                                                                                                                                                                                                                                                                                                                                                                                                                                                                                                                                                                                                                                                                                                                                                                                                                                                                                                                                                                                              |
|--------------------------------------------------------------------------------------------------------------------------------------------|--------------------------------------------------------------------------------------------------|------------------------------------------------------------------------------------------------------------------------------------------------------------------------------------------------------------------------------------------------------------------------------------------------------------------------------------------------------------------------------------------------------------------------------------------------------------------------------------------------------------------------------------------------------------------------------------------------------------------------------------------------------------------------------------------------------------------------------------------------------------------------------------------------------------------------------------------------------------------------------------------------------------------------------------------------------------------------------------------------------------------------------------------------------------------------------------------------------------------------------------------------------------------------------------------------------------------------------------------------------------------------------------------------------------------------------------------------------------------------------|
| <p><b>Cancer/<br/>Immunosuppression,<br/>including transplant<br/>recipients and<br/>disorders of immune<br/>function <sup>b</sup></b></p> | <p>140.XX-208.9 except<br/>173.XX; 279.XX;<br/>V42.0; V42.1; V42.6;<br/>V42.7; V42.8; 996.XX</p> | <p>azathioprine, cyclosporine, tacrolimus, mycophenolate mofetil, sirolimus, daclizumab, oral corticosteroids (<math>\geq</math> 60 days in past year), filgrastim, sargramostim, and chemotherapeutic agents including alkylating agents (busulfan, chlorambucil, cyclophosphamide, mechlorethamine hydrochloride, mitomycin, cisplatin, carmustine, temozolomide), antimetabolites (mecaptopurine, fluorouracil, cytarabine, melphalan, thioguanine, etoposide, fludarabine phosphate, capecitabine, gemcitabine), antibiotics (bleomycin sulfate, doxorubicin hydrochloride, actinomycin, mitoxantrone hydrochloride, idarubicin hydrochloride), plant alkaloids (vincristine sulfate, vinblastine sulfate, paclitaxel, vinorelbine), anti-estrogens (tamoxifen citrate, toremifene citrate) and miscellaneous anti-neoplastic agents (protein-asparaginase-mannitol, hydroxyurea, procarbazine hydrochloride, lomustine, mitotane, testolactone, aminoglutethimide, interferon alpha, leuprolide acetate, flutamide, carboplatin, goserelin acetate, levamisole, estamustine phosphate sodium, interferon gamma-1B, altretamine, aldesleukin, bicalutamide, anastrozole, nilutamide, trimetrexate, letrozole, alitretinoin, irinotecan hydrochloride, bexarotene, tretinoin, imatinib, topotecan hydrochloride, arsenic trioxide, fulvestrant, gefitinib, rituximab)</p> |
|--------------------------------------------------------------------------------------------------------------------------------------------|--------------------------------------------------------------------------------------------------|------------------------------------------------------------------------------------------------------------------------------------------------------------------------------------------------------------------------------------------------------------------------------------------------------------------------------------------------------------------------------------------------------------------------------------------------------------------------------------------------------------------------------------------------------------------------------------------------------------------------------------------------------------------------------------------------------------------------------------------------------------------------------------------------------------------------------------------------------------------------------------------------------------------------------------------------------------------------------------------------------------------------------------------------------------------------------------------------------------------------------------------------------------------------------------------------------------------------------------------------------------------------------------------------------------------------------------------------------------------------------|

|                                                                          |                                               |                                                                                                                                                                                                                                                                                          |
|--------------------------------------------------------------------------|-----------------------------------------------|------------------------------------------------------------------------------------------------------------------------------------------------------------------------------------------------------------------------------------------------------------------------------------------|
| <b>Chronic renal or hepatic disease, including cirrhosis<sup>b</sup></b> | 571.XX; 581.XX-<br>583.XX; 585.XX-<br>587.XX  |                                                                                                                                                                                                                                                                                          |
| <b>Chronic oral corticosteroid use</b>                                   |                                               | triamcinolone, fludrocortisone, methylprednisolone, prednisolone, prednisone, paramethasone, cortisone acetate, dexamethasone, hydrocortisone, and celestone                                                                                                                             |
| <b>Diabetes mellitus<sup>b</sup></b>                                     | 250.XX                                        | insulin, oral hypoglycemics (chlorpropamide, tolazamide, tolbutamide, acetohexamide, glyburide, glipizide, metformin, acarbose, glimepiride, troglitazone, repaglinide, miglitol, maleate, pioglitazone, nateglinide, glyburide-metformin, rosiglitazone-metformin, metformin-glipizide) |
| <b>Alcohol Abuse</b>                                                     | 303.XX; 305.0; 305.01;<br>291.1; 291.2; V11.3 |                                                                                                                                                                                                                                                                                          |
| <b>Tobacco Use</b>                                                       | 305.1; V15.82                                 |                                                                                                                                                                                                                                                                                          |

<sup>a</sup> From claims in the year prior to the index date; <sup>b</sup> Condition must be found for one hospital or emergency department discharge or two outpatient visits of different date; <sup>c</sup>Total ≥120 days supply in past year
